# Supplementary material for: The role of external power demand on the choice of technique in classic cross-country skiing
Source: PLoS One. 2023 Mar 31;18(3):e0283794. doi: 10.1371/journal.pone.0283794 (PMC10065268; doi:10.1371/journal.pone.0283794)
Supplement: S1 Data — (XLSX) [file pone.0283794.s001.xlsx]

## Sheet: OutcomePowerForce
																								Version with 'imaginary' shifts
	empty cells = no shift occurred																							Note changed order																				Mean Incrementral&Decremental
	Means of all legal shifts																																											Used for Trigger (Control Parameter) Id.
		DK->DP					DP->DK					DS->DK					DK->DS							DP->DK					DK->DS					DS->DK					DK->DP					DK-DP					DS-DK
																								Force Increment					Force Increment					Force Decrement					Force Decrement					THE EMPTY CELLS: ONE TECHNIQUE USED - NO SHIFTS WHATSOEVER…
Participant	Avg Power	V10I05	V10I08	V12I05	V12I08		V10I05	V10I08	V12I05	V12I08		V10I05	V10I08	V12I05	V12I08		V10I05	V10I08	V12I05	V12I08				V10I05	V10I08	V12I05	V12I08		V10I05	V10I08	V12I05	V12I08		V10I05	V10I08	V12I05	V12I08		V10I05	V10I08	V12I05	V12I08		V10I05	V10I08	V12I05	V12I08		V10I05
		Power at shift																						Power
1	247.327	154.593	224.523	241.83	267.742		265.811	249.193	277.989	297.733														265.811	249.193	277.989	297.733		295.12	309.599	308.532	334.99		131.058	208.092	176.601	248.475		154.593	224.523	241.83	267.742		210.202	236.858	259.909	282.737		213.089
2	239.949	160.959		216.236			148.547		247.78				263.746		297.186			267.689		311.456				148.547	191.196	247.78	228.333		288.814	267.689	282.394	311.456		130.703	263.746	168.021	297.186		160.959	191.196	216.236	228.333		154.753	191.196	232.008	228.333		209.758
3	177.314	127.903		177.988			133.637	170.707	176.975				191.271					214.114						133.637	170.707	176.975			168.042	214.114	216.645	186.16		88.9435	191.271	136.299	261.445		127.903	153.482	177.988			130.77	162.095	177.481			128.493
4	259.161			264.403					281.276			187.944	284.478	284.632	297.082		196.552	252.073	281.272	320.83				144.441	224.989	281.276	270.981		196.552	252.073	281.272	320.83		187.944	284.478	284.632	297.082		144.441	224.989	264.403	270.981		144.441	224.989	272.84	270.981		192.248
5	247.892	270.632		247.045			265.614	250.24	261.251	286.913			268.5	282.724	308.194			276.949	283.26	307.311				265.614	250.24	261.251	286.913		304.486	276.949	283.26	307.311		146.608	268.5	282.724	308.194		270.632	191.977	247.045	237.639		268.123	221.109	254.148	262.276		225.547
6	219.899			188.656	263.648				179.626	249.825		147.471		202.795	270.767		174.678		206.057	247.337				128.283		179.626	249.825		174.678	195.842	206.057	247.337		147.471	283.199	202.795	270.767		128.283		188.656	263.648		128.283		184.141	256.736		161.074
7	160.633						105.399	159.937	149.856			102.6					132.047	160.898	171.173	193.754				105.399	159.937	149.856	172.118		132.047	160.898	171.173	193.754		102.6	135.002	124.599	172.118		86.0279	135.002	124.599	172.118		95.7133	147.47	137.227	172.118		117.324
8	285.398		268.202	252.151				291.27	342.965						324.437			330.29		324.134				327.254	291.27	342.965	275.433			330.29	377.688	324.134			227.385	192.839	324.437		327.254	268.202	252.151	275.433		327.254	279.736	297.558	275.433
9	181.457			159.217					172.337			145.4	171.459	188.575			146.004	192.719	203.866	225				104.054	156.357	172.337	197.116		146.004	192.719	203.866	225		145.4	171.459	188.575	197.116		104.054	156.357	159.217	197.116		104.054	156.357	165.777	197.116		145.702
10	183.9	128.652		152.092			166.562		165.578			129.689		151.8			166.598		182.525					166.562		165.578			166.598	155.81	182.525	194.202		129.689	218.99	151.8	276.281		128.652		152.092			147.607		158.835			148.143
11	223.507																												129.06	202.257	177.547	251.431		202.604	274.764	254.684	314.552												165.832
12	219.342	139.591					154.609	200.02	224.51	250.533		205.697	223.459	272.952	278.59		218.218	234.561	267.552	277.262				154.609	200.02	224.51	250.533		218.218	234.561	267.552	277.262		205.697	223.459	272.952	278.59		139.591	181.546	153.048	220.016		147.1	190.783	188.779	235.274		211.957
13	259.239	219.467	252.174	254.118	332.506		220.805	259.417	255.415	314.313		244.32	277.724	273.229	335.226		242.912	277.659	268.242	331.141				220.805	259.417	255.415	314.313		242.912	277.659	268.242	331.141		244.32	277.724	273.229	335.226		219.467	252.174	254.118	332.506		220.136	255.796	254.767	323.41		243.616
14	268.465	182.765		239.758			208.518	264.912	267.324	331.689		210.282	267.965	271.045	337.894		235.449	291.358	283.846	349.618				208.518	264.912	267.324	331.689		235.449	291.358	283.846	349.618		210.282	267.965	271.045	337.894		182.765	234.368	239.758	287.702		195.642	249.64	253.541	309.695		222.866
		Force at shift																						Force
1		2.25469	0.417239	14.2602	-0.088409		42.3429	9.32677	25.1212	8.93767														42.3429	9.32677	25.1212	8.93767		52.5288	30.8155	34.8294	20.7273		-4.905	-4.84364	-4.905	-4.905		2.25469	0.417239	14.2602	-0.088409		22.2988	4.872	19.6907	4.42463		23.8119
2		8.57522		10.5983			4.10146		20.0733				20.286		14.4766			21.71		18.7713				4.10146	-4.905	20.0733	-4.905		54.2724	21.71	30.995	18.7713		-1.72012	20.286	-4.1566	14.4766		8.57522	-4.905	10.5983	-4.905		6.33834	-4.905	15.3358	-4.905		26.2761
3		6.26624		8.71565			8.33295	0.293407	8.41112				7.71995					15.9698						8.33295	0.293407	8.41112			20.3242	15.9698	20.8297	0		-4.905	7.71995	-4.10241	17.8617		6.26624	-4.905	8.71565			7.29959	-2.3058	8.56338			7.70958
4				17.0146					22.0825			10.25	16.3663	23.0906	3.03809		13.3526	4.66324	22.0816	10.1854				-4.79681	-4.40713	22.0825	-4.905		13.3526	4.66324	22.0816	10.1854		10.25	16.3663	23.0906	3.03809		-4.79681	-4.40713	17.0146	-4.905		-4.79681	-4.40713	19.5485	-4.905		11.8013
5		46.8355		18.5811			45.0266	13.6073	22.8484	9.58356			20.2019	29.2983	15.9885			23.2533	29.4593	15.7226				45.0266	13.6073	22.8484	9.58356		58.6529	23.2533	29.4593	15.7226		2.75994	20.2019	29.2983	15.9885		46.8355	-4.905	18.5811	-4.905		45.9311	4.35115	20.7147	2.33928		30.7064
6				0.901474	2.38191				-1.81104	-1.77849		2.30067		5.14818	4.5244		12.1074		6.12811	-2.52714				-3.99404		-1.81104	-1.77849		12.1074	0	6.12811	-2.52714		2.30067	24.975	5.14818	4.5244		-3.99404		0.901474	2.38191		-3.99404		-0.454781	0.301708		7.20405
7							1.54485	1.20682	3.6557			0.536021					11.1503	1.55372	10.0589	1.75935				1.54485	1.20682	3.6557	-4.905		11.1503	1.55372	10.0589	1.75935		0.536021	-4.905	-4.23518	-4.905		-4.85181	-4.905	-4.23518	-4.905		-1.65348	-1.84909	-0.289738	-4.905		5.84314
8			9.3876	12.5574				17.7184	39.8355						10.1701			31.8105		10.079				59.3194	17.7184	39.8355	-4.78453			31.8105	50.81	10.079			-4.62212	-4.905	10.1701		59.3194	9.3876	12.5574	-4.78453		59.3194	13.553	26.1964	-4.78453
9				1.24068					5.18161			10.7366	-2.0365	10.0592			10.9541	5.64149	14.6522	9.81				-3.5681	-4.905	5.18161	-4.86282		10.9541	5.64149	14.6522	4.94724		10.7366	-2.0365	10.0592	-4.86282		-3.5681	-4.905	1.24068	-4.86282		-3.5681	-4.905	3.21115	-4.86282		10.8453
10		5.0527		-0.546174			18.7174		3.50466			5.42656		-0.633816			18.7303		8.5952					18.7174		3.50466			18.7303	0	8.5952	0		5.42656	15.2634	-0.633816	20.2289		5.0527		-0.546174			11.885		1.47924			12.0784
11																													0	0	0.436669	0.900787		20.0269	19.433	19.5006	15.7744												10.0134
12		3.69842					9.11169	1.2737	15.909	4.43843		27.5262	9.73873	30.4596	12.8824		32.0393	13.7483	28.8375	12.4827				9.11169	1.2737	15.909	4.43843		32.0393	13.7483	28.8375	12.4827		27.5262	9.73873	30.4596	12.8824		3.69842	-4.72252	-4.905	-4.905		6.40506	-1.72441	5.50201	-0.233285		29.7828
13		22.6013	6.10056	14.9139	15.1002		23.0837	8.7165	15.3036	9.62496		31.5593	15.328	20.6544	15.9188		31.0518	15.3046	19.1563	14.6893				23.0837	8.7165	15.3036	9.62496		31.0518	15.3046	19.1563	14.6893		31.5593	15.328	20.6544	15.9188		22.6013	6.10056	14.9139	15.1002		22.8425	7.40853	15.1087	12.3626		31.3056
14		5.13395		6.36274			14.4169	4.69737	14.6428	8.85063		15.0526	5.79972	15.7606	10.7182		24.1241	14.2483	19.6057	14.2466				14.4169	4.69737	14.6428	8.85063		24.1241	14.2483	19.6057	14.2466		15.0526	5.79972	15.7606	10.7182		5.13395	-4.905	6.36274	-4.55627		9.77541	-0.103814	10.5028	2.14718		19.5884
	Descriptive data
	Mean Power (W) during technique
		DS						DK						DP
Participant		V10I05	V10I08	V12I05	V12I08	Mean		V10I05	V10I08	V12I05	V12I08	Mean		V10I05	V10I08	V12I05	V12I08	Mean
1								257.628	265.852	275.483	293.08	273.011		195.334	244.973	220.91	275.478	234.174
2			272.193		316.417	294.305		210.339	240.279	246.386	270.789	241.948		159.024		207.855		183.44
3			215.961		221.999	218.98		141.521	182.23	169.284		164.345		111.542	170.796	157.494		146.611
4		204.938	276.411	302.443	312.623	274.104		182.544	252.677	275.871	297.317	252.102		154.607		248.051		201.329
5			281.047	290.734	314.015	295.265		272.281	238.81	268.275	276.779	264.036		210.952	229.436	215.406	265.177	230.243
6		175.231	235.898	221.026	278.917	227.768		154.086		187.191	258.28	199.853				183.866	253.534	218.7
7		123.169	161.882	165.029	206.448	164.132		112.88	154.609	164.409	190.694	155.648		103.152	160.783	152.144		138.693
8			316.28		312.933	314.607			286.642	312.36	306.317	301.773		247.056	284.657	262.678		264.797
9		149.464	195.834	206.438		183.912		135.496	181.014	174.369		163.626				158.591		158.591
10		160.911	186.362	180.985	232.41	190.167		146.653		165.203		155.928		132.905		158.774		145.839
11		163.967	236.512	213.843	279.704	223.507
12		222.395	237.781	270.479	279.128	252.446		178.62	210.028	252.43	256.994	224.518		143.338	198.396	193.145	239.015	193.473
13		249.494	286.876	280.172	343.424	289.991		230.903	267.158	262.556	323.147	270.941		195.407	247.209	227.375	303.155	243.286
14		233.173	288.315	288.821	352.124	290.608		207.68	268.076	267.284	325.564	267.151		184.134	256.356	238.658	315.717	248.716
	Mean rel. Time (-) of technique
		DS						DK						DP
Participant		V10I05	V10I08	V12I05	V12I08	Mean		V10I05	V10I08	V12I05	V12I08	Mean		V10I05	V10I08	V12I05	V12I08	Mean
1		0	0	0	0	0		0.217641	0.612224	0.271153	0.651806	0.438206		0.782359	0.387776	0.728847	0.348194	0.561794
2		0	0.212584	0	0.255332	0.116979		0.979741	0.787416	0.34097	0.744668	0.713199		0.0202586	0	0.65903	0	0.169822
3		0	0.438061	0	1	0.359515		0.473049	0.450234	0.704862	0	0.407037		0.526951	0.111705	0.295138	0	0.233448
4		0.383652	0.767564	0.188273	0.697997	0.509371		0.612843	0.232436	0.30274	0.302003	0.362506		0.00350439	0	0.508987	0	0.128123
5		0	0.265856	0.136764	0.236103	0.159681		0.217742	0.540521	0.190897	0.562745	0.377976		0.782258	0.193623	0.672339	0.201153	0.462343
6		0.559406	1	0.467389	0.867281	0.723519		0.440594	0	0.252396	0.0337426	0.181683		0	0	0.280215	0.0989765	0.094798
7		0.450838	0.838271	0.604367	0.70527	0.649687		0.472289	0.102922	0.240978	0.29473	0.27773		0.0768733	0.0588075	0.154655	0	0.0725839
8		0	0.538099	0	0.666589	0.301172		0	0.0310974	0.390418	0.333411	0.188732		1	0.430804	0.609582	0	0.510096
9		0.313532	0.597	0.318514	0.723281	0.488082		0.686468	0.403	0.608926	0.276719	0.493778		0	0	0.0725598	0	0.0181399
10		0.45398	1	0.525435	1	0.744854		0.032247	0	0.0495145	0	0.0204404		0.513773	0	0.425051	0	0.234706
11		1	1	1	1	1		0	0	0	0	0		0	0	0	0	0
12		0.141055	0.324613	0.110338	0.161882	0.184472		0.586177	0.610161	0.411778	0.685291	0.573352		0.272768	0.0652256	0.477884	0.152827	0.242176
13		0.178818	0.279801	0.173005	0.188639	0.205066		0.251953	0.347067	0.220712	0.134008	0.238435		0.569229	0.373132	0.606282	0.677354	0.556499
14		0.320621	0.427781	0.237703	0.377592	0.340924		0.309817	0.419723	0.297887	0.323837	0.337816		0.369561	0.152496	0.464411	0.298571	0.32126
	MeanCR (Hz) during technique
		DS						DK						DP
Participant		V10I05	V10I08	V12I05	V12I08	Mean		V10I05	V10I08	V12I05	V12I08	Mean		V10I05	V10I08	V12I05	V12I08	Mean
1								0.72353	0.728966	0.74317	0.743702	0.734842		0.908444	0.960398	0.929785	1.00316	0.950447
2			0.7991		0.854962	0.827031		0.710576	0.734684	0.753934	0.769017	0.742053		0.798762		0.858662		0.828712
3			0.983913		1.04342	1.01367		0.835368	0.887189	0.884333		0.868963		1.08123	1.14087	1.13483		1.11897
4		0.756255	0.850504	0.901155	0.895727	0.85091		0.720693	0.718274	0.838642	0.800968	0.769644		0.86255		0.914907		0.888728
5			0.813092	0.815413	0.83423	0.820912		0.779144	0.741716	0.787185	0.762478	0.767631		0.922351	0.974702	0.935892	0.97962	0.953141
6		0.832371	0.869442	0.896661	0.957163	0.88891		0.740086		0.812243	1.05958	0.870637				1.05695	1.17608	1.11651
7		0.83053	0.855288	0.896592	0.973937	0.889087		0.752292	0.799639	0.824356	0.864996	0.810321		1.00741	1.25815	1.19366		1.15307
8			0.860263		0.876027	0.868145			1.11273	0.763914	0.793854	0.890165		1.03932	1.13284	1.04214		1.07143
9		0.810763	0.834248	0.89076	0.903773	0.859886		0.709777	0.722547	0.744566	0.815413	0.748076				0.916818		0.916818
10		0.870462	0.861945	0.900761	0.933161	0.891582		0.923193		1.08366		1.00343		1.00276		1.04696		1.02486
11		0.857509	0.904082	0.893879	0.946512	0.900496
12		0.829171	0.808593	0.898669	0.9009	0.859333		0.741286	0.745416	0.810329	0.828724	0.781439		1.03105	1.05906	1.11403	1.1701	1.09356
13		0.762019	0.769648	0.802856	0.890047	0.806143		0.682728	0.731148	0.735518	0.783575	0.733242		0.80715	0.923117	0.840448	0.963341	0.883514
14		0.762591	0.766217	0.778981	0.801676	0.777366		0.70818	0.723207	0.710972	0.782982	0.731335		0.877651	0.949138	0.854691	1.02007	0.925386
	Minimal Power (W) during technique
		DS						DK						DP
Participant		V10I05	V10I08	V12I05	V12I08	Mean		V10I05	V10I08	V12I05	V12I08	Mean		V10I05	V10I08	V12I05	V12I08	Mean
1								150.305	223.35	237.878	263.836	218.842		145.98	222.986	190.922	264.903	206.198
2			245.614		294.713	270.164		145.692	206.32	213.803	242.185	202		147.806		179.053		163.429
3			189.766		200.75	195.258		125.93	166.111	144.269		145.437		104.391	168.022	151.029		141.147
4		165.754	238.607	203.329	285.521	223.303		153.684	239.265	205.922	286.248	221.28		154.127		204.359		179.243
5			265.199	275.904	300.017	280.373		255.253	206.857	242.849	254.923	239.971		161.203	211.385	180.245	253.635	201.617
6		139.375	209.367	190.81	246.45	196.5		143.194		173.14	246.049	187.461				168.483	250.061	209.272
7		100.795	151.669	139.443	188.541	145.112		100.87	150.747	150.16	185.902	146.92		100.617	154.655	143.607		132.96
8			269.413		289.378	279.396			255.845	251.26	287.836	264.98		174.152	241.392	205.906		207.15
9		139.047	170.389	187.001		165.479		115.501	170.89	156.026		147.472				148.611		148.611
10		128.541	169.223	151.313	208.158	164.309		128.106		150.679		139.393		112.007		150.784		131.396
11		140.741	216.671	189.691	262.765	202.467
12		203.309	222.33	253.234	267.959	236.708		126.316	196.648	223.386	236.216	195.642		125.789	196.07	168.784	235.593	181.559
13		241.061	272.675	263.967	329.567	276.818		218.087	250.031	251.834	312.279	258.058		174.657	239.389	205.551	282.476	225.519
14		206.149	266.823	269.307	332.823	268.776		180.846	249.52	238.343	301.583	242.573		168.806	250.875	223.173	301.802	236.164
	Maximal Power (W) during technique
		DS						DK						DP
Participant		V10I05	V10I08	V12I05	V12I08	Mean		V10I05	V10I08	V12I05	V12I08	Mean		V10I05	V10I08	V12I05	V12I08	Mean
1								284.859	297.265	298.067	322.046	300.56		266.343	274.519	281.331	298.835	280.257
2			296.082		334.136	315.109		275.915	281.603	268.647	315.303	285.367		170.314		250.712		210.513
3			236.559		253.797	245.178		154.022	217.085	202.843		191.317		136.293	173.338	179.529		163.053
4		239.05	311.387	345.564	343.244	309.812		213.255	286.816	338.184	322.724	290.245		155.077		316.684		235.88
5			299.633	306.189	331.574	312.465		291.014	279.683	287.429	311.571	292.424		285.28	251.346	263.742	287.087	271.864
6		197.597	270.069	235.269	309.447	253.095		175.454		214.545	272.358	220.786				200.356	263.329	231.843
7		139.625	174.292	197.697	225.07	184.171		134.843	160.761	175.389	194.991	166.496		107.136	164.957	158.321		143.471
8			358.765		346.307	352.536			332.123	371.037	327.448	343.536		316.595	327.782	349.952		331.443
9		164.098	208.077	225.389		199.188		153.644	194.224	207.542		185.137				173.207		173.207
10		183.713	204.495	203.065	262.911	213.546		169.019		183.399		176.209		168.687		180.385		174.536
11		188.411	262.48	242.765	301.392	248.762
12		236.159	252.376	286.124	291.951	266.652		221.541	237.328	285.356	286.813	257.759		167.369	200.626	226.237	250.699	211.233
13		259.998	300.876	297.419	354.952	303.311		246.019	285.023	278.336	335.936	286.328		221.926	262.011	257.627	334.14	268.926
14		251.099	310.745	304.568	371.811	309.556		237.133	292.7	287.384	352.824	292.51		210.313	265.853	268.532	335.092	269.947
[truncated: 11 more columns]
